# Supplementary material
Source: PubMed Central journal article supplement (PMC4902129)
Supplement: cs6b00321_si_001.pdf [file cs6b00321_si_001.pdf]

## **SUPPORTING INFORMATION**

### **Size and Promoter Effects on Stability of Carbon-Nanofiber-Supported Iron-Based Fischer–Tropsch Catalysts**

Jingxiu Xie<sup>†</sup>, Hirsia M. Torres Galvis<sup>†,||</sup>, Ard C. J. Koeken<sup>‡</sup>, Alexey Kirilin<sup>‡</sup>, A. Iulian Dugulan<sup>§</sup>, Matthijs Ruitenbeek<sup>‡</sup> and Krijn P. de Jong<sup>†,\*</sup>

<sup>†</sup>Inorganic Chemistry and Catalysis, Debye Institute for Nanomaterials Science, Utrecht University, Universteitsweg 99, 3584 CG, Utrecht, The Netherlands

<sup>‡</sup>Dow Benelux B.V., P.O. Box 48, 4530 AA, Terneuzen, The Netherland

<sup>§</sup>Fundamental Aspects of Materials and Energy Group, Delft University of Technology, Mekelweg 15, 2629 JB, Delft, The Netherlands

**\*corresponding author: [K.P.deJong@uu.nl](mailto:K.P.deJong@uu.nl)**

**SI 1. Elemental loading determined by ICP-AES**

**SI 2. TEM images of fresh and spent catalysts**

**SI 3. Catalytic performance**

**SI 4. In situ Mossbauer spectroscopy**

**SI 5. Reduction profiles**

**SI 6. In situ carbon deposition studies (TEOM)**

## SI 1. Elemental loading

Table S1. Elemental loading of catalysts

|                  | Fe    | Na   | S       | Ni   | K       |
|------------------|-------|------|---------|------|---------|
| <b>Blank CNF</b> | 0.03  | 0.06 | < 0.007 | 0.01 | < 0.014 |
| <b>3Fe</b>       | 1.92  | 0.03 | < 0.005 | 0.08 | < 0.002 |
| <b>4Fe</b>       | 5.09  | 0.03 | < 0.006 | 0.09 | < 0.003 |
| <b>7Fe</b>       | 9.24  | 0.02 | < 0.004 | 0.11 | < 0.002 |
| <b>9Fe</b>       | 15.06 | 0.03 | 0.007   | 0.04 | < 0.003 |
| <b>3FeP</b>      | 2.02  | 0.10 | 0.02    | 0.07 | < 0.004 |
| <b>4FeP</b>      | 4.94  | 0.24 | 0.04    | 0.07 | < 0.004 |
| <b>7FeP</b>      | 9.34  | 0.41 | 0.07    | 0.06 | < 0.002 |
| <b>9FeP</b>      | 15.60 | 0.68 | 0.11    | 0.05 | < 0.004 |

## SI 2. TEM images of fresh and spent catalysts

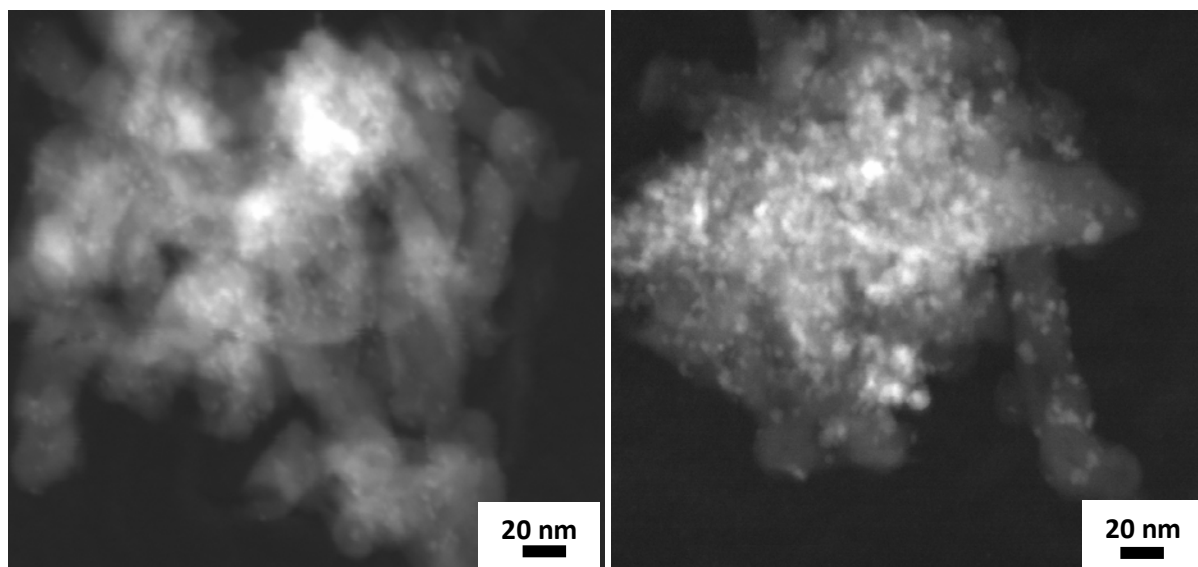

**Figure S1.** TEM images of 2PFeCNF (left) and 20PFeCNF (right).

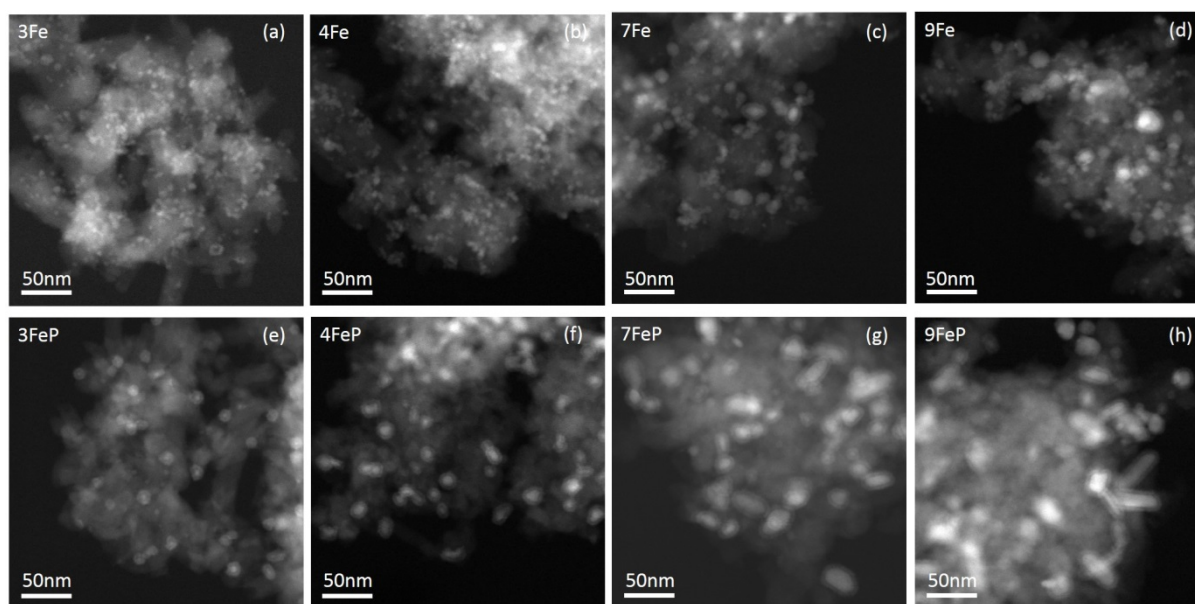

**Figure S2.** Particle size distribution of spent catalysts after carbon deposition studies (TOS = 4 h).

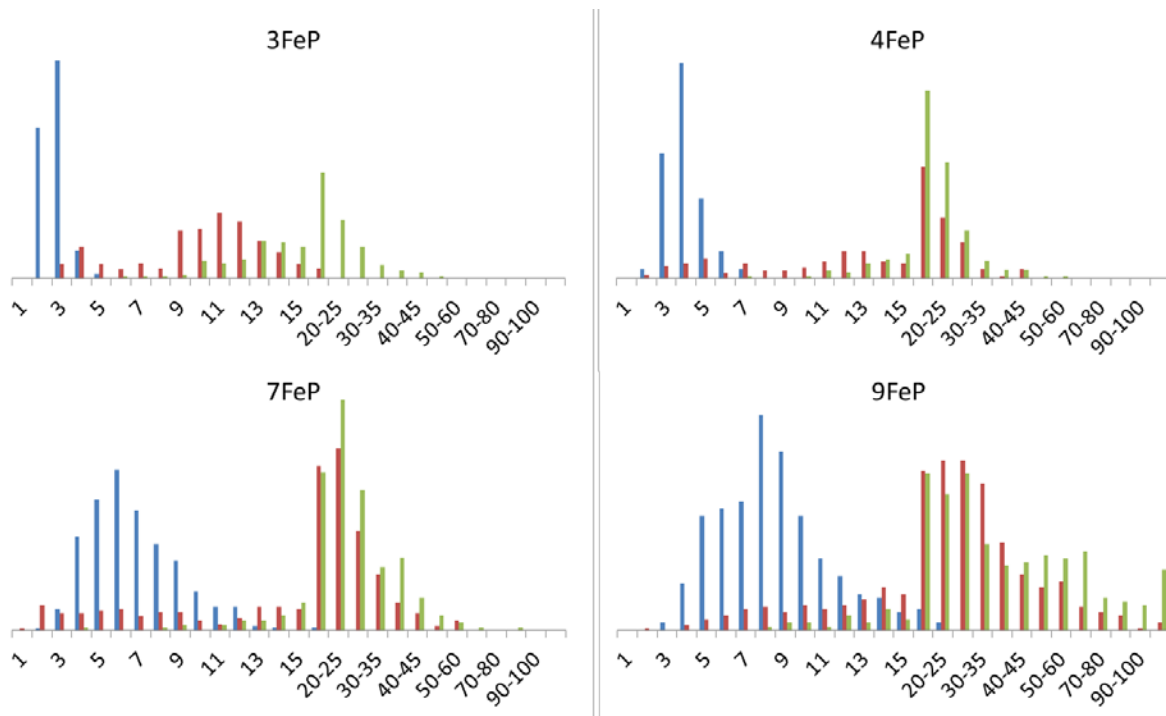

**Figure S3.** Particle size distribution of fresh and spent promoted catalysts (blue: fresh, red: after 4 h, and green: after 100 h)

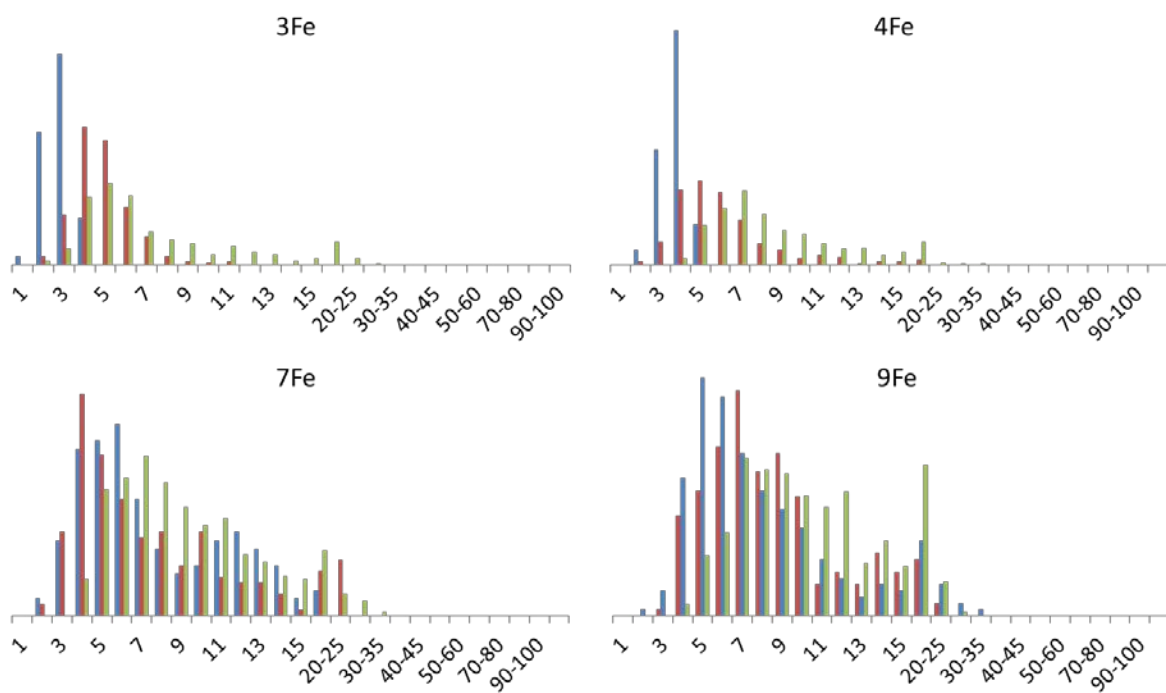

**Figure S4.** Particle size distribution of fresh and spent unpromoted catalysts (blue: fresh, red: after 4 h, and green: after 100 h).

### SI 3. Catalytic performance

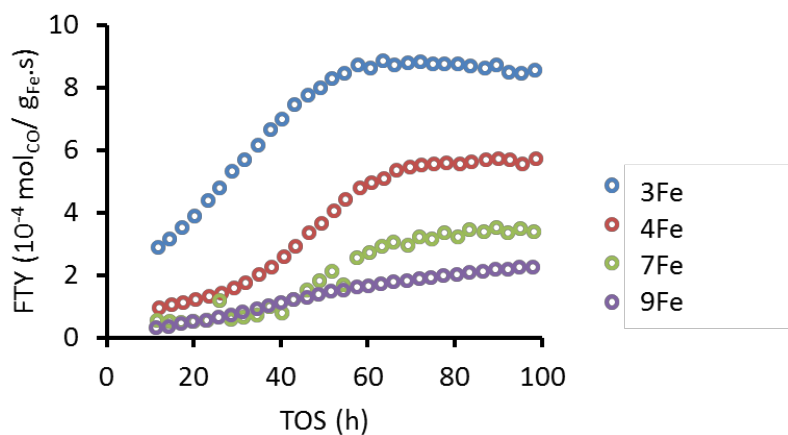

**Figure S5.** Iron time yield (FTY) of unpromoted catalysts (340 °C, 20 bar, H<sub>2</sub>/CO/He = 45/45/10, and GHSV = 7 200 h<sup>-1</sup>).

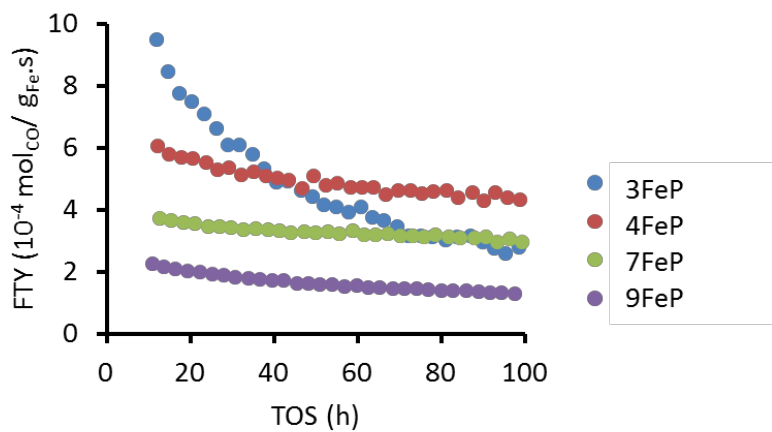

**Figure S6.** Iron time yield (FTY) of promoted catalysts (340 °C, 20 bar, H<sub>2</sub>/CO/He = 45/45/10, and GHSV = 7 200 h<sup>-1</sup>).

**Table S2. Catalytic performance of CNF-supported Fe catalysts under FTO conditions (340 °C, 20 bar, H<sub>2</sub>/CO/He = 45/45/10, GHSV = 7 200 h<sup>-1</sup>, TOS = 12 h).**

|      | CO conv.<br>(%) | CO <sub>2</sub> sel.<br>(%) | FTY (10 <sup>-4</sup><br>mol <sub>CO</sub> /g <sub>Fe</sub> ·s) | Product Selectivity (% C <sub>atr</sub> , CO <sub>2</sub> free) |                                            |                                              |                 |
|------|-----------------|-----------------------------|-----------------------------------------------------------------|-----------------------------------------------------------------|--------------------------------------------|----------------------------------------------|-----------------|
|      |                 |                             |                                                                 | CH <sub>4</sub>                                                 | C <sub>2</sub> – C <sub>4</sub><br>olefins | C <sub>2</sub> – C <sub>4</sub><br>paraffins | C <sub>5+</sub> |
| 3Fe  | 9               | 23                          | 2.9                                                             | 59                                                              | 10                                         | 28                                           | 2               |
| 4Fe  | 8               | 27                          | 1.0                                                             | 60                                                              | 9                                          | 30                                           | 1               |
| 7Fe  | 9               | 32                          | 0.6                                                             | 53                                                              | 13                                         | 28                                           | 6               |
| 9Fe  | 9               | 35                          | 0.3                                                             | 52                                                              | 21                                         | 20                                           | 7               |
| 3FeP | 31              | 46                          | 9.5                                                             | 20                                                              | 40                                         | 28                                           | 12              |
| 4FeP | 50              | 46                          | 6.0                                                             | 11                                                              | 49                                         | 8                                            | 32              |
| 7FeP | 61              | 47                          | 3.7                                                             | 8                                                               | 54                                         | 6                                            | 33              |
| 9FeP | 73              | 47                          | 2.2                                                             | 8                                                               | 56                                         | 6                                            | 30              |

**Table S3. Catalytic performance of CNF-supported Fe catalysts under FTO conditions (340 °C, 20 bar, H<sub>2</sub>/CO/He = 45/45/10, GHSV = 7 200 h<sup>-1</sup>, TOS = 100 h).**

|      | CO conv.<br>(%) | CO <sub>2</sub> sel.<br>(%) | FTY (10 <sup>-4</sup><br>mol <sub>CO</sub> /g <sub>Fe</sub> ·s) | Product Selectivity (% C <sub>atr</sub> , CO <sub>2</sub> free) |                                            |                                              |                 |
|------|-----------------|-----------------------------|-----------------------------------------------------------------|-----------------------------------------------------------------|--------------------------------------------|----------------------------------------------|-----------------|
|      |                 |                             |                                                                 | CH <sub>4</sub>                                                 | C <sub>2</sub> – C <sub>4</sub><br>olefins | C <sub>2</sub> – C <sub>4</sub><br>paraffins | C <sub>5+</sub> |
| 3Fe  | 27              | 35                          | 8.4                                                             | 44                                                              | 18                                         | 29                                           | 9               |
| 4Fe  | 46              | 42                          | 5.6                                                             | 34                                                              | 25                                         | 26                                           | 14              |
| 7Fe  | 57              | 40                          | 3.5                                                             | 38                                                              | 31                                         | 21                                           | 10              |
| 9Fe  | 73              | 47                          | 2.3                                                             | 38                                                              | 28                                         | 23                                           | 11              |
| 3FeP | 10              | 39                          | 2.9                                                             | 28                                                              | 49                                         | 16                                           | 7               |
| 4FeP | 35              | 46                          | 4.3                                                             | 12                                                              | 50                                         | 8                                            | 30              |
| 7FeP | 48              | 47                          | 3.0                                                             | 9                                                               | 55                                         | 5                                            | 30              |
| 9FeP | 42              | 46                          | 1.3                                                             | 9                                                               | 59                                         | 4                                            | 28              |

#### SI 4. In-situ Mossbauer spectroscopy

**Table S4. The Mössbauer fitted parameters of 4Fe(P) samples, obtained at 300 K.**

| Sample/<br>Treatment                                        | IS<br>( $\text{mm}\cdot\text{s}^{-1}$ ) | QS<br>( $\text{mm}\cdot\text{s}^{-1}$ ) | Hyperfine<br>field (T)      | $\Gamma$<br>( $\text{mm}\cdot\text{s}^{-1}$ ) | Phase                                                                                                                                                              | Spectral<br>contribution<br>n (%) |
|-------------------------------------------------------------|-----------------------------------------|-----------------------------------------|-----------------------------|-----------------------------------------------|--------------------------------------------------------------------------------------------------------------------------------------------------------------------|-----------------------------------|
| 4Fe<br>Fresh sample                                         | 0.33                                    | 0.72                                    | -                           | 0.64                                          | $\text{Fe}^{3+}$                                                                                                                                                   | 100                               |
| 4Fe<br>Ar/ $\text{H}_2=2$<br>350 °C,<br>2 bar, 2 h          | 0.25<br>1.09                            | 0.27<br>0.39                            | -<br>-                      | 0.38<br>0.75                                  | $\text{Fe}_x\text{C}$<br>$\text{Fe}^{2+}$                                                                                                                          | 18<br>82                          |
| 4Fe<br>$\text{H}_2/\text{CO}=1$<br>340 °C,<br>20 bar, 20 h  | 0.21<br>1.08<br>1.23                    | 0.13<br>0.30<br>1.41                    | -<br>-<br>-                 | 0.45<br>0.55<br>0.43                          | $\text{Fe}_x\text{C}$<br>$\text{Fe}^{2+}$<br>$\text{Fe}^{2+}$                                                                                                      | 16<br>71<br>13                    |
| 4FeP<br>Fresh sample                                        | 0.34                                    | 0.71                                    | -                           | 0.70                                          | $\text{Fe}^{3+}$                                                                                                                                                   | 100                               |
| 4FeP<br>Ar/ $\text{H}_2=2$<br>350 °C,<br>2 bar, 2 h         | 0.24<br>1.11                            | 0.27<br>0.47                            | -<br>-                      | 0.41<br>0.77                                  | $\text{Fe}_x\text{C}$<br>$\text{Fe}^{2+}$                                                                                                                          | 18<br>82                          |
| 4FeP<br>$\text{H}_2/\text{CO}=1$<br>340 °C,<br>20 bar, 20 h | 0.27<br>0.26<br>0.18<br>0.21            | -<br>-<br>-<br>-                        | 16.5<br>22.2<br>18.1<br>9.2 | 0.49<br>0.45<br>0.45<br>0.45                  | $\epsilon'$ - $\text{Fe}_{2.2}\text{C}$<br>$\chi$ - $\text{Fe}_5\text{C}_2$ (I)<br>$\chi$ - $\text{Fe}_5\text{C}_2$ (II)<br>$\chi$ - $\text{Fe}_5\text{C}_2$ (III) | 47<br>21<br>16<br>16              |

Experimental uncertainties: Isomer shift: I.S.  $\pm 0.02 \text{ mm s}^{-1}$ ; Quadrupole splitting: Q.S.  $\pm 0.02 \text{ mm s}^{-1}$ ; Line width:  $\Gamma \pm 0.03 \text{ mm s}^{-1}$ ; Hyperfine field:  $\pm 0.1 \text{ T}$ ; Spectral contribution:  $\pm 3\%$ .

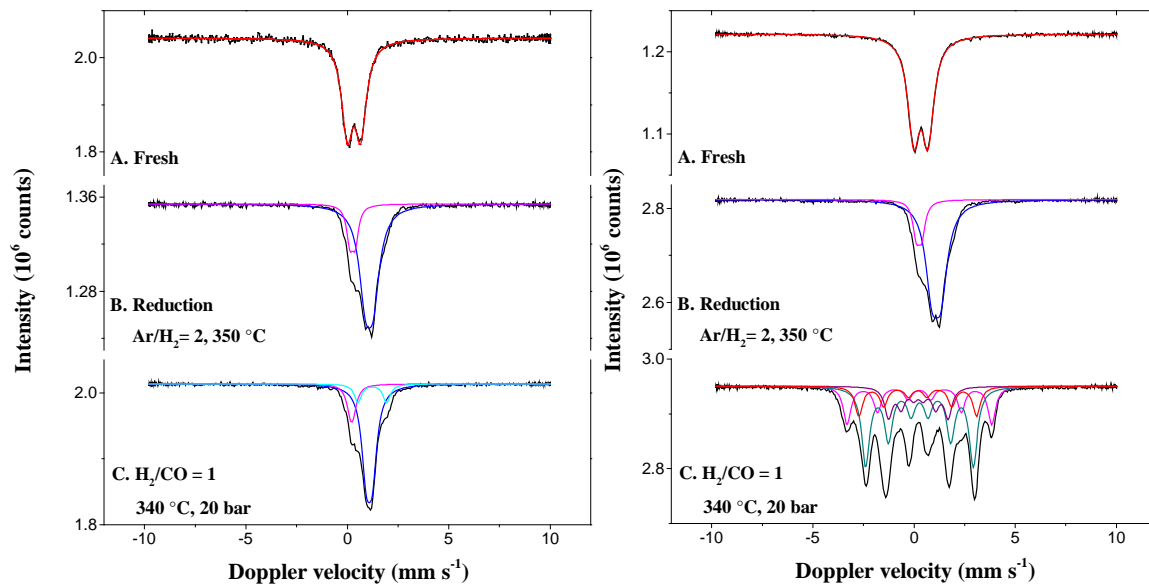

**Figure S7.** Mössbauer spectra obtained at 300 K with 4Fe (left) and 4FeP (right)

**Table S5. The Mössbauer fitted parameters of 4Fe(P) samples, obtained at 4.2 K.**

| Sample/<br>Treatment                                    | IS<br>(mm·s <sup>-1</sup> ) | QS<br>(mm·s <sup>-1</sup> ) | Hyperfine<br>field (T) | Γ<br>(mm·s <sup>-1</sup> ) | Phase                                  | Spectral<br>contribution<br>n (%) |
|---------------------------------------------------------|-----------------------------|-----------------------------|------------------------|----------------------------|----------------------------------------|-----------------------------------|
| 4Fe<br>Ar/H <sub>2</sub> =2<br>350 °C,<br>2 bar, 2 h    | 0.23                        | -                           | 25.7                   | 0.60                       | χ-Fe <sub>5</sub> C <sub>2</sub> (I)   | 10                                |
|                                                         | 0.20                        | -                           | 21.5                   | 0.60                       | χ-Fe <sub>5</sub> C <sub>2</sub> (II)  | 10                                |
|                                                         | 0.24                        | -                           | 11.8                   | 0.60                       | χ-Fe <sub>5</sub> C <sub>2</sub> (III) | 5                                 |
|                                                         | 0.46                        | 0.08                        | 51.0                   | 0.46                       | Fe <sup>3+</sup>                       | 4                                 |
|                                                         | 1.29                        | -1.84                       | 38.8                   | 1.19                       | Fe <sup>2+</sup>                       | 27                                |
|                                                         | 1.25                        | -0.28                       | 37.3                   | 1.19                       | Fe <sup>2+</sup>                       | 40                                |
|                                                         | 1.08                        | 1.97                        | -                      | 0.52                       | Fe <sup>2+</sup>                       | 4                                 |
| 4Fe<br>H <sub>2</sub> /CO=1<br>340 °C,<br>20 bar, 20 h  | 0.22                        | -                           | 23.8                   | 0.62                       | χ-Fe <sub>5</sub> C <sub>2</sub> (I)   | 8                                 |
|                                                         | 0.20                        | -                           | 19.0                   | 0.62                       | χ-Fe <sub>5</sub> C <sub>2</sub> (II)  | 7                                 |
|                                                         | 0.24                        | -                           | 11.3                   | 0.62                       | χ-Fe <sub>5</sub> C <sub>2</sub> (III) | 5                                 |
|                                                         | 0.57                        | -0.45                       | 53.3                   | 0.48                       | Fe <sup>3+</sup>                       | 4                                 |
|                                                         | 1.18                        | -1.01                       | 39.5                   | 1.27                       | Fe <sup>2+</sup>                       | 32                                |
|                                                         | 1.21                        | -0.27                       | 35.3                   | 1.27                       | Fe <sup>2+</sup>                       | 40                                |
|                                                         | 1.12                        | 2.10                        | -                      | 0.50                       | Fe <sup>2+</sup>                       | 4                                 |
| 4FeP<br>Ar/H <sub>2</sub> =2<br>350 °C,<br>2 bar, 2 h   | 0.23                        | -                           | 26.1                   | 0.80                       | χ-Fe <sub>5</sub> C <sub>2</sub> (I)   | 10                                |
|                                                         | 0.22                        | -                           | 22.2                   | 0.80                       | χ-Fe <sub>5</sub> C <sub>2</sub> (II)  | 9                                 |
|                                                         | 0.24                        | -                           | 10.9                   | 0.80                       | χ-Fe <sub>5</sub> C <sub>2</sub> (III) | 6                                 |
|                                                         | 0.45                        | -0.06                       | 52.0                   | 0.49                       | Fe <sup>3+</sup>                       | 3                                 |
|                                                         | 1.17                        | -1.55                       | 39.5                   | 1.52                       | Fe <sup>2+</sup>                       | 31                                |
|                                                         | 1.22                        | -0.26                       | 37.3                   | 1.52                       | Fe <sup>2+</sup>                       | 37                                |
|                                                         | 1.15                        | 1.99                        | -                      | 0.60                       | Fe <sup>2+</sup>                       | 4                                 |
| 4FeP<br>H <sub>2</sub> /CO=1<br>340 °C,<br>20 bar, 20 h | 0.26                        | -                           | 18.6                   | 0.48                       | e'-Fe <sub>2.2</sub> C                 | 42                                |
|                                                         | 0.27                        | -                           | 26.1                   | 0.47                       | χ-Fe <sub>5</sub> C <sub>2</sub> (I)   | 26                                |
|                                                         | 0.15                        | -                           | 20.9                   | 0.47                       | χ-Fe <sub>5</sub> C <sub>2</sub> (II)  | 17                                |
|                                                         | 0.20                        | -                           | 10.5                   | 0.47                       | χ-Fe <sub>5</sub> C <sub>2</sub> (III) | 15                                |

Experimental uncertainties: Isomer shift: I.S. ± 0.02 mm s<sup>-1</sup>; Quadrupole splitting: Q.S. ± 0.02 mm s<sup>-1</sup>; Line width: Γ ± 0.03 mm s<sup>-1</sup>; Hyperfine field: ± 0.1 T; Spectral contribution: ± 3%.



**Table S6. The Mössbauer fitted parameters of 9Fe(P) samples, obtained at 300 K.**

| Sample/<br>Treatment                                    | <i>I</i> S<br>(mm·s <sup>-1</sup> ) | <i>Q</i> S<br>(mm·s <sup>-1</sup> ) | Hyperfine<br>field (T) | $\Gamma$<br>(mm·s <sup>-1</sup> ) | Phase                                  | Spectral<br>contribution<br>n (%) |
|---------------------------------------------------------|-------------------------------------|-------------------------------------|------------------------|-----------------------------------|----------------------------------------|-----------------------------------|
| 9Fe<br>Fresh sample                                     | 0.34                                | 0.78                                | -                      | 0.65                              | Fe <sup>3+</sup>                       | 100                               |
| 9Fe<br>Ar/H <sub>2</sub> =2<br>350 °C,<br>2 bar, 2 h    | 0.16                                | 0.22                                | -                      | 0.45                              | Fe <sub>x</sub> C                      | 17                                |
|                                                         | 1.08                                | 0.19                                | -                      | 0.66                              | Fe <sup>2+</sup>                       | 66                                |
|                                                         | 1.15                                | 1.32                                | -                      | 0.51                              | Fe <sup>2+</sup>                       | 17                                |
| 9Fe<br>H <sub>2</sub> /CO=1<br>340 °C,<br>20 bar, 20 h  | 0.25                                | 0.35                                | -                      | 0.47                              | Fe <sub>x</sub> C                      | 17                                |
|                                                         | 1.09                                | 0.23                                | -                      | 0.61                              | Fe <sup>2+</sup>                       | 68                                |
|                                                         | 1.11                                | 1.58                                | -                      | 0.55                              | Fe <sup>2+</sup>                       | 15                                |
| 9FeP<br>Fresh sample                                    | 0.00                                | -                                   | 33.0                   | 0.30                              | Fe <sup>0</sup>                        | 7                                 |
|                                                         | 0.34                                | 0.69                                | -                      | 0.66                              | Fe <sup>3+</sup>                       | 34                                |
|                                                         | 0.38                                | 0.05                                | 45.6                   | 1.52                              | Fe <sup>3+</sup>                       | 12                                |
|                                                         | 0.38                                | -                                   | -                      | 1.73                              | Fe <sup>3+</sup>                       | 47                                |
| 9FeP<br>Ar/H <sub>2</sub> =2<br>350 °C,<br>2 bar, 2 h   | 0.00                                | -                                   | 33.3                   | 0.28                              | Fe <sup>0</sup>                        | 50                                |
|                                                         | 0.28                                | 0.29                                | -                      | 0.41                              | Fe <sub>x</sub> C                      | 8                                 |
|                                                         | 1.09                                | 0.33                                | -                      | 0.70                              | Fe <sup>2+</sup>                       | 42                                |
| 9FeP<br>H <sub>2</sub> /CO=1<br>340 °C,<br>20 bar, 20 h | 0.25                                | -                                   | 17.1                   | 0.39                              | ε'-Fe <sub>2.2</sub> C                 | 72                                |
|                                                         | 0.22                                | -                                   | 22.4                   | 0.35                              | χ-Fe <sub>5</sub> C <sub>2</sub> (I)   | 7                                 |
|                                                         | 0.18                                | -                                   | 18.6                   | 0.35                              | χ-Fe <sub>5</sub> C <sub>2</sub> (II)  | 13                                |
|                                                         | 0.20                                | -                                   | 9.1                    | 0.35                              | χ-Fe <sub>5</sub> C <sub>2</sub> (III) | 8                                 |

Experimental uncertainties: Isomer shift: I.S. ± 0.02 mm s<sup>-1</sup>; Quadrupole splitting: Q.S. ± 0.02 mm s<sup>-1</sup>; Line width:  $\Gamma$  ± 0.03 mm s<sup>-1</sup>; Hyperfine field: ± 0.1 T; Spectral contribution: ± 3%.

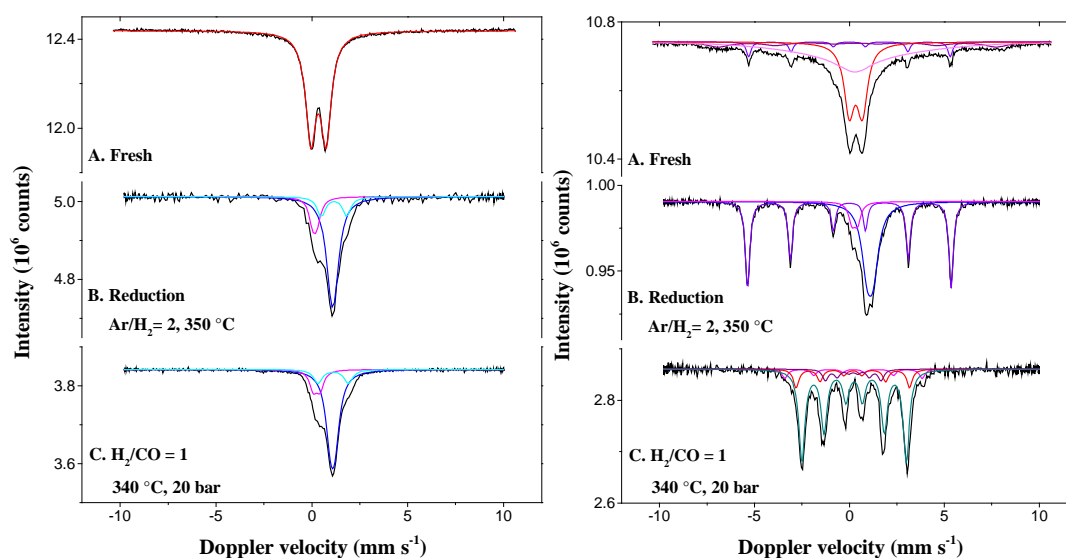

**Figure S8.** Mössbauer spectra obtained at 300 K with 9Fe (left) and 9FeP (right)

**Table S7. The Mössbauer fitted parameters of 9Fe(P) samples, obtained at 4.2 K.**

| Sample/<br>Treatment                                    | IS<br>(mm·s <sup>-1</sup> ) | QS<br>(mm·s <sup>-1</sup> ) | Hyperfine<br>field (T) | Γ<br>(mm·s <sup>-1</sup> ) | Phase                                  | Spectral<br>contribution<br>n (%) |
|---------------------------------------------------------|-----------------------------|-----------------------------|------------------------|----------------------------|----------------------------------------|-----------------------------------|
| 9Fe<br>Ar/H <sub>2</sub> =2<br>350 °C,<br>2 bar, 2 h    | 0.24                        | -                           | 25.9                   | 0.80                       | χ-Fe <sub>5</sub> C <sub>2</sub> (I)   | 11                                |
|                                                         | 0.20                        | -                           | 22.2                   | 0.80                       | χ-Fe <sub>5</sub> C <sub>2</sub> (II)  | 12                                |
|                                                         | 0.22                        | -                           | 11.9                   | 0.80                       | χ-Fe <sub>5</sub> C <sub>2</sub> (III) | 5                                 |
|                                                         | 0.37                        | -0.07                       | 52.2                   | 0.67                       | Fe <sup>3+</sup>                       | 5                                 |
|                                                         | 1.39                        | -1.38                       | 39.5                   | 1.17                       | Fe <sup>2+</sup>                       | 29                                |
|                                                         | 1.12                        | -0.35                       | 36.7                   | 1.17                       | Fe <sup>2+</sup>                       | 31                                |
| 9Fe<br>H <sub>2</sub> /CO=1<br>340 °C,<br>20 bar, 20 h  | 1.12                        | 2.00                        | -                      | 0.62                       | Fe <sup>2+</sup>                       | 7                                 |
|                                                         | 0.24                        | -                           | 24.8                   | 0.79                       | χ-Fe <sub>5</sub> C <sub>2</sub> (I)   | 13                                |
|                                                         | 0.20                        | -                           | 20.2                   | 0.79                       | χ-Fe <sub>5</sub> C <sub>2</sub> (II)  | 9                                 |
|                                                         | 0.22                        | -                           | 12.8                   | 0.79                       | χ-Fe <sub>5</sub> C <sub>2</sub> (III) | 5                                 |
|                                                         | 0.50                        | -0.11                       | 51.9                   | 0.36                       | Fe <sup>3+</sup>                       | 3                                 |
|                                                         | 1.38                        | -1.37                       | 39.9                   | 1.16                       | Fe <sup>2+</sup>                       | 25                                |
| 9FeP<br>Ar/H <sub>2</sub> =2<br>350 °C,<br>2 bar, 2 h   | 1.17                        | -0.32                       | 36.2                   | 1.16                       | Fe <sup>2+</sup>                       | 37                                |
|                                                         | 1.06                        | 2.13                        | -                      | 0.55                       | Fe <sup>2+</sup>                       | 8                                 |
|                                                         | 0.00                        | -                           | 34.5                   | 0.33                       | Fe <sup>0</sup>                        | 42                                |
|                                                         | 0.22                        | -                           | 19.2*                  | 0.37                       | Fe <sub>x</sub> C                      | 12                                |
|                                                         | 1.12                        | -0.57                       | 39.4                   | 1.26                       | Fe <sup>2+</sup>                       | 24                                |
|                                                         | 1.18                        | -0.90                       | 35.0                   | 1.26                       | Fe <sup>2+</sup>                       | 22                                |
| 9FeP<br>H <sub>2</sub> /CO=1<br>340 °C,<br>20 bar, 20 h | 0.25                        | -                           | 18.7                   | 0.42                       | ε'-Fe <sub>2.2</sub> C                 | 68                                |
|                                                         | 0.25                        | -                           | 25.6                   | 0.40                       | χ-Fe <sub>5</sub> C <sub>2</sub> (I)   | 11                                |
|                                                         | 0.18                        | -                           | 20.4                   | 0.40                       | χ-Fe <sub>5</sub> C <sub>2</sub> (II)  | 14                                |
|                                                         | 0.20                        | -                           | 10.1                   | 0.40                       | χ-Fe <sub>5</sub> C <sub>2</sub> (III) | 7                                 |

Experimental uncertainties: Isomer shift: I.S. ± 0.02 mm s<sup>-1</sup>; Quadrupole splitting: Q.S. ± 0.02 mm s<sup>-1</sup>; Line width: Γ ± 0.03 mm s<sup>-1</sup>; Hyperfine field: ± 0.1 T; Spectral contribution: ± 3%. \*Average magnetic field.

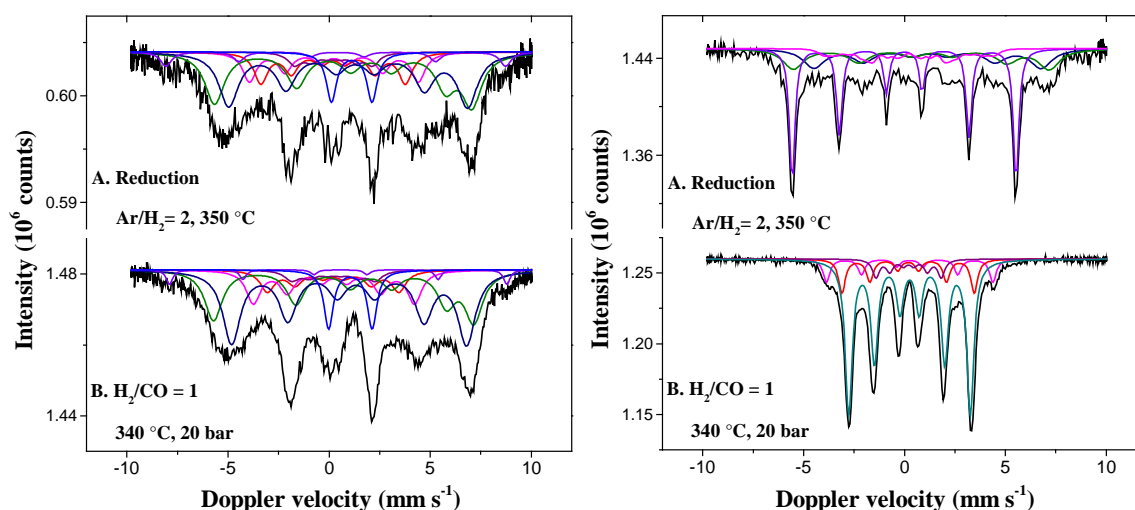

**Figure S9.** Mössbauer spectra obtained at 4.2 K with 9Fe (left) and 9FeP (right).

## SI 5. Reduction profiles

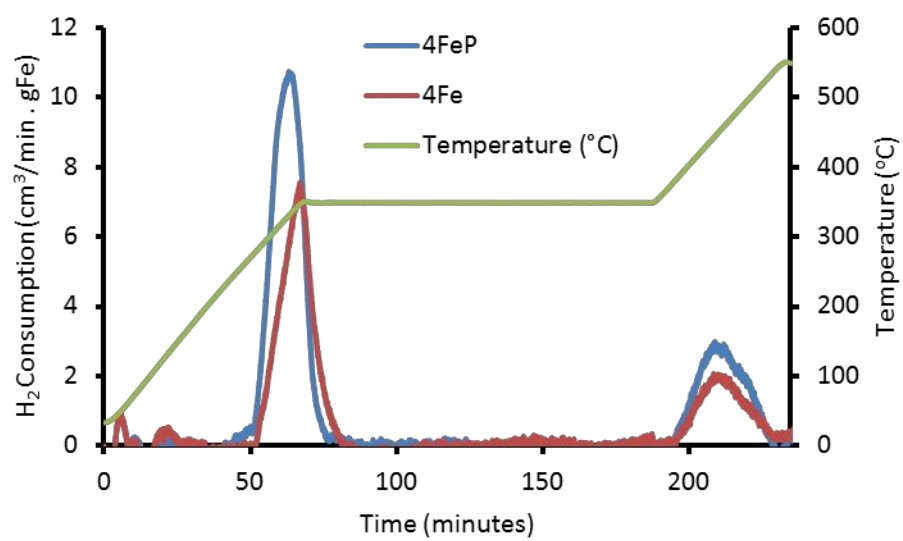

**Figure S10.** Temperature programmed reduction profiles of 4FeP and 4Fe.

**Table S8.** The Mössbauer fitted parameters of 7FeP sample, obtained at 300 K.

| Sample/<br>Treatment | IS<br>( $\text{mm}\cdot\text{s}^{-1}$ ) | QS<br>( $\text{mm}\cdot\text{s}^{-1}$ ) | Hyperfine<br>field (T) | $\Gamma$<br>( $\text{mm}\cdot\text{s}^{-1}$ ) | Phase                 | Spectral<br>contribution<br>n (%) |
|----------------------|-----------------------------------------|-----------------------------------------|------------------------|-----------------------------------------------|-----------------------|-----------------------------------|
| 7FeP                 | 0.02                                    | -                                       | 32.7                   | 0.35                                          | $\text{Fe}^0$         | 8                                 |
| Ar/H <sub>2</sub> =2 | 0.23                                    | 0.31                                    | -                      | 0.51                                          | $\text{Fe}_x\text{C}$ | 18                                |
| 350 °C,              | 1.07                                    | -                                       | -                      | 0.68                                          | $\text{Fe}^{2+}$      | 65                                |
| 2 bar, 2 h           | 1.07                                    | 1.47                                    | -                      | 0.51                                          | $\text{Fe}^{2+}$      | 9                                 |
| 7FeP                 | 0.01                                    | -                                       | 32.8                   | 0.40                                          | $\text{Fe}^0$         | 24                                |
| Ar/H <sub>2</sub> =2 | 0.23                                    | 0.31                                    | -                      | 0.63                                          | $\text{Fe}_x\text{C}$ | 18                                |
| 350 °C,              | 1.08                                    | -                                       | -                      | 0.67                                          | $\text{Fe}^{2+}$      | 51                                |
| 2 bar, 24 h          | 1.06                                    | 1.50                                    | -                      | 0.55                                          | $\text{Fe}^{2+}$      | 7                                 |

Experimental uncertainties: Isomer shift: I.S.  $\pm 0.02 \text{ mm s}^{-1}$ ; Quadrupole splitting: Q.S.  $\pm 0.02 \text{ mm s}^{-1}$ ; Line width:  $\Gamma \pm 0.03 \text{ mm s}^{-1}$ ; Hyperfine field:  $\pm 0.1 \text{ T}$ ; Spectral contribution:  $\pm 3\%$ .

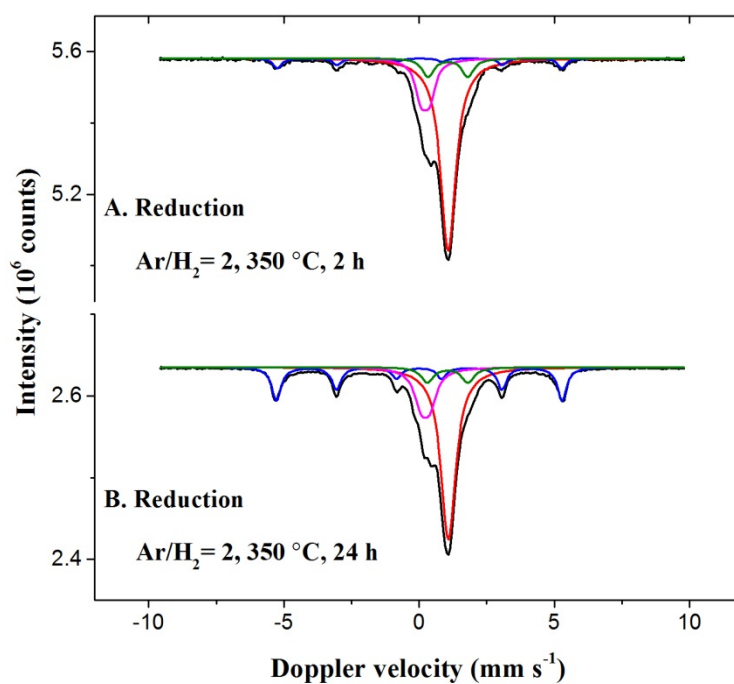**Figure S11.** Mössbauer spectra obtained at 300 K with 7FeP sample.

## SI 6. In-situ carbon deposition studies (TEOM)

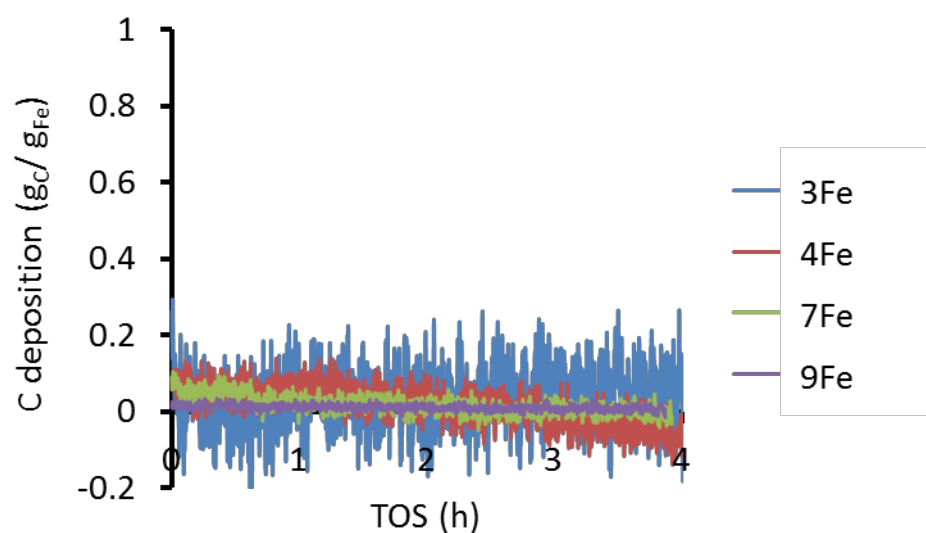

**Figure S12.** C deposition of unpromoted catalysts (340 °C, 20 bar,  $\text{H}_2/\text{CO} = 1$ , and  $\text{GHSV} = 54\,000\ \text{h}^{-1}$ ).

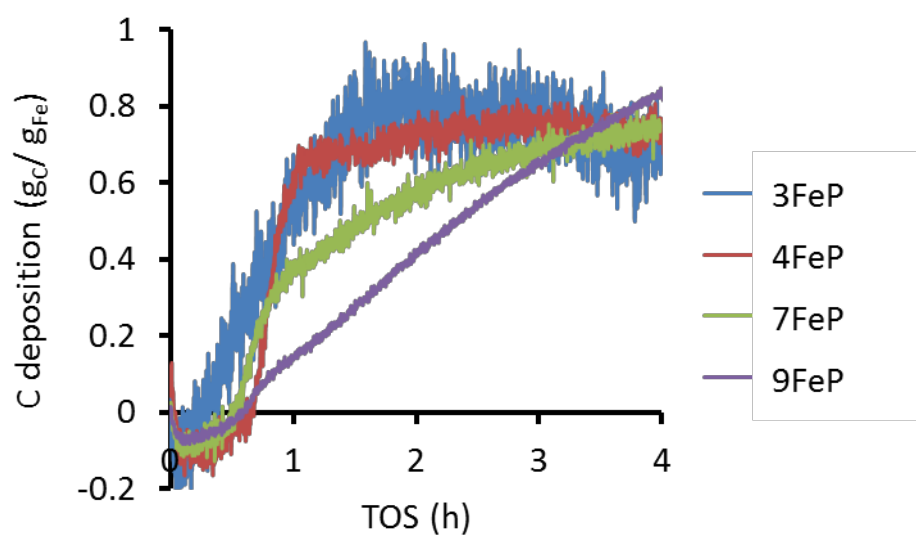

**Figure S13.** C deposition of promoted catalysts (340 °C, 20 bar,  $\text{H}_2/\text{CO} = 1$ , and  $\text{GHSV} = 54\,000\ \text{h}^{-1}$ ).
